# Supplementary material
Source: PubMed Central journal article supplement (PMC2562989)
Supplement: NIHMS45811-supplement-supplement_1.pdf [file NIHMS45811-supplement-supplement_1.pdf]

Online Supplementary Materials (Ma. et al)

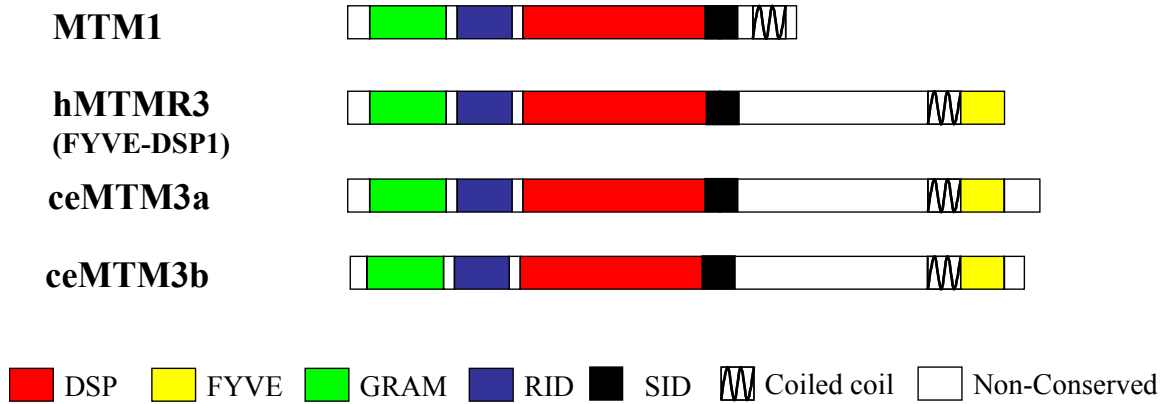

**Fig. S1. Schematic sequence alignment of human MTM1, human MTMR3 (FYVE-DSP1) and ceMTM3.**

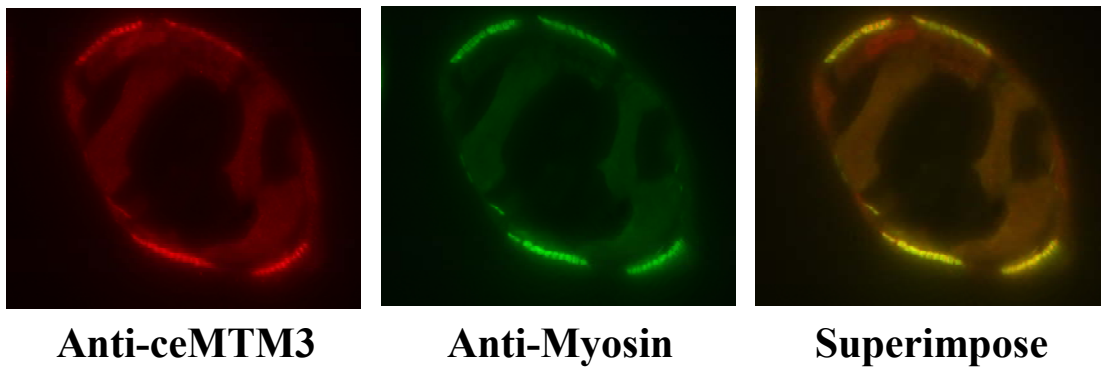

**Fig. S2. Confirmation of ceMTM3 distribution in the body muscle of *C. elegans*.** Paraffin-embedded cross sections of adult *C. elegans* were subjected to indirect immunofluorescent staining with anti-ceMTM3 (red) and muscle marker anti-myosin (green).
